# Supplementary material for: The N-end rule pathway and Ubr1 enforce protein compartmentalization via P2-encoded cellular location signals
Source: Oxford University Press journal article supplement (doi:10.1242/jcs.231662), 2019-04-02
Supplement: jcs231662supp.pdf [file jcs231662supp.pdf]

## Figure S1

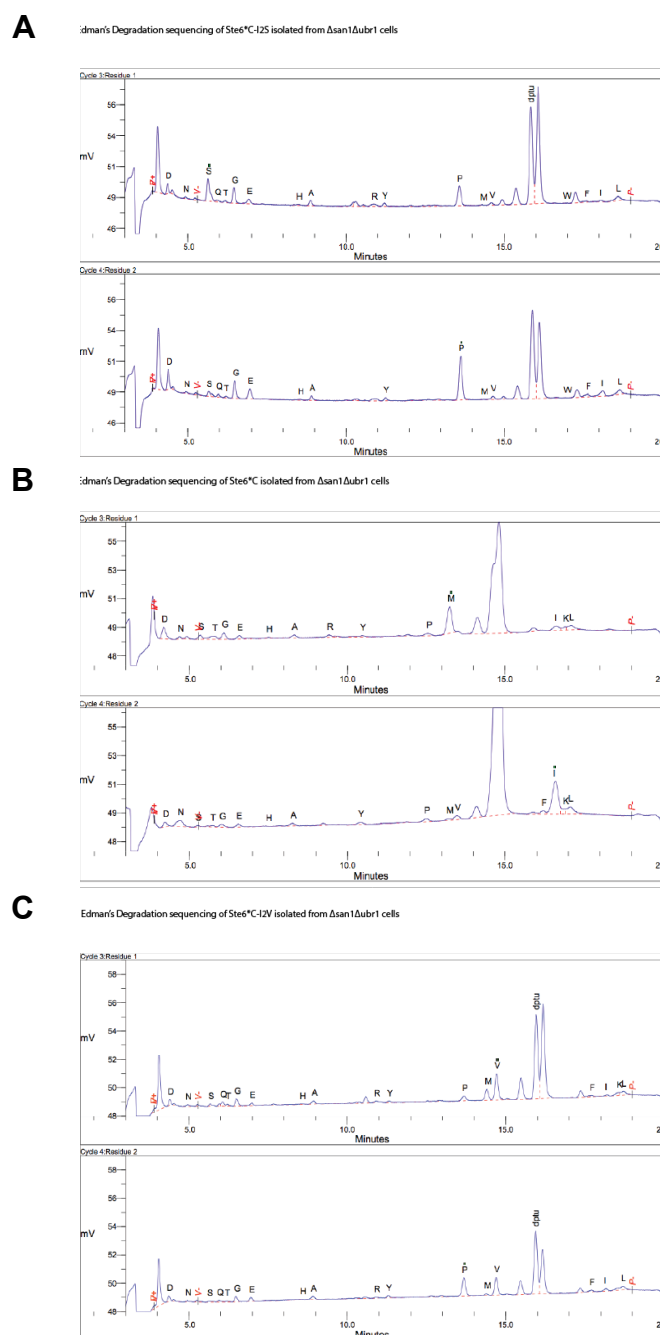

**Fig. S1. N-terminal sequencing of Ste6<sup>\*</sup>C constructs.** (A) Lysate was prepared from  $\Delta$ san1 $\Delta$ ubr1 cells expressing Ste6<sup>\*</sup>C-HA-I2S. Protein was immunoprecipitated from lysate with anti-HA affinity matrix (Roche), resolved by SDS-PAGE, and transferred to PVDF membrane. Protein band carrying Ste6<sup>\*</sup>C-HA was excised from the membrane and sequenced via Edman degradation. (B) Lysate was prepared from  $\Delta$ san1 $\Delta$ ubr1 cells expressing Ste6<sup>\*</sup>C-HA. Protein was immunoprecipitated from lysate and sequenced as described in Fig S1A. (C) Lysate was prepared from  $\Delta$ san1 $\Delta$ ubr1 cells expressing Ste6<sup>\*</sup>C-HA-I2V. Protein was immunoprecipitated from lysate and sequenced as described in Fig S1A.

**Figure S2**

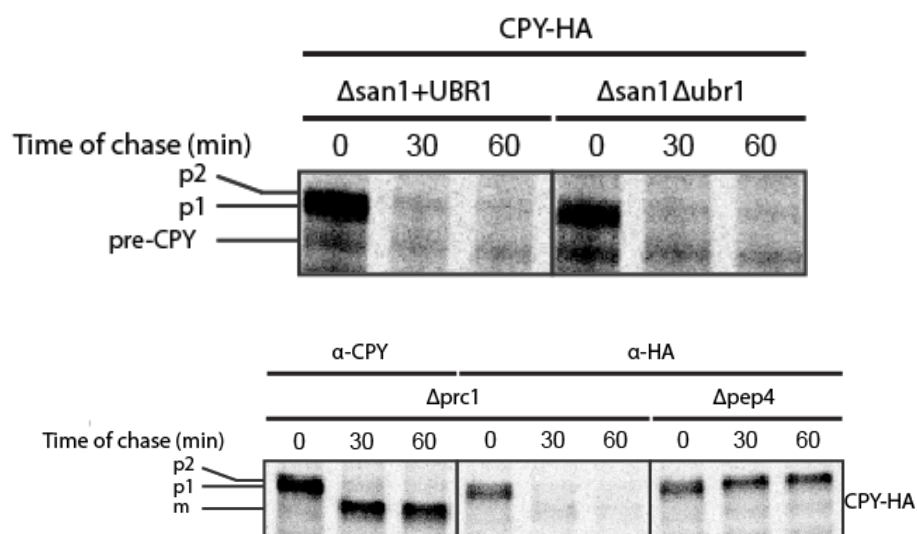

**Fig S2. C-terminal HA-tag is removed from HA-tagged CPY in the vacuole.** Turnover rate of CPY-HA was assessed in  $\Delta prc1$ ,  $\Delta pep4$ ,  $\Delta san1+UBR1$ , and  $\Delta san1\Delta ubr1$  cells by metabolic pulse-chase as described in Fig 1. CPY was probed with anti-CPY and anti-HA antibodies in  $\Delta prc1$  cells, and anti-HA in  $\Delta pep4$  cells.

Figure S3

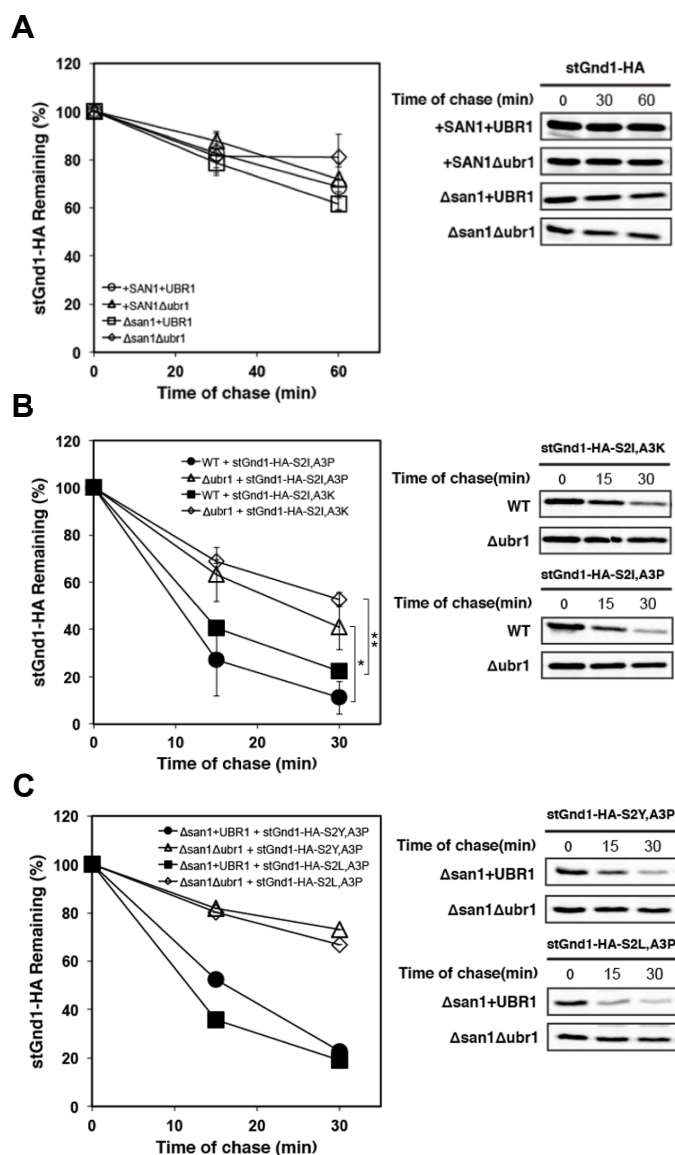

**Fig S3. Ubr1-mediated degradation of stGnd1 is P2-residue/N-degron dependent.** (A) Turnover rate of C-terminally HA-tagged stGnd1 (stGnd1-HA) expressed in +SAN1+UBR1 (wild-type),  $\Delta$ san1+UBR1, +SAN1 $\Delta$ ubr1, and  $\Delta$ san1 $\Delta$ ubr1 cells was assessed by metabolic pulse-chase. Error bars, mean  $\pm$  SD of two independent experiments (N=2, biological replicates). (B) Turnover rates of C-terminally HA-tagged stGnd1-HA-S2IA3K and stGnd1-HA-S2IA3P expressed in wild-type and  $\Delta$ ubr1 cells were assessed by metabolic pulse-chase. Error bars, mean  $\pm$  SD of two or three independent experiments (N=2 for stGnd1-HA-S2IA3K; N=3 for stGnd1-HA-S2IA3P). (C) Turnover rates of C-terminally HA-tagged stGnd1-HA-S2YA3P and stGnd1-HA-S2LA3P expressed in  $\Delta$ san1+UBR1 and  $\Delta$ san1 $\Delta$ ubr1 cells were assessed by metabolic pulse-chase (N=1, biological replicates). (A-C) Metabolic pulse-chase was performed as described in Fig 1.

Tables S1–S32 have been uploaded to the Dryad Digital Repository at <https://doi.org/10.5061/dryad.r837vv7> (Tran, 2019).
